# Supplementary material for: Ecofriendly ruthenium-containing nanomaterials: synthesis, characterization, electrochemistry, bioactivity and catalysis
Source: Royal Society of Chemistry journal article supplement (doi:10.1039/d0na00051e), 2020-01-01
Supplement: d0na00051e1.pdf [file d0na00051e1.pdf]

Electronic Supplementary Information (ESI)

## Ecofriendly Ruthenium Containing Nanomaterials: Synthesis, Characterization, Electrochemistry, Bioactivity and Catalysis

Pranshu K. Gupta and Lallan Mishra\*

\*Department of Chemistry, Institute of Science, Banaras Hindu University, Varanasi-221005, India, lmishrabhu@yahoo.co.in

### Contents or Supplementary Description (SD):

- SD1. Tables regarding bioactive and catalytic of Ru-cNMs reported till 2019
- SD2. Table depicting tentative synthesis mechanism of green Ru-cNMs
- SD3. Tauc Relation and calculation of optical bandgap
- SD4. Absorption Surface Concentration Ratio (ASCR)
- SD5. Williamson Hall Equation
- SD6. X-ray Absorption and Near Edge Spectroscopy (XAS and XANES)
- SD7. Electron Diffraction Spectroscopy (EDAX)
- SD8. Brunauer Emmet and Teller (BET) plots and measurement of other surface parameters
- SD9. Electrochemical Calculations
- SD10. Electronic setup of Direct Methanol Fuel Cell (DMFC) setup

### Abbreviations:

**Angio.:** Angiosperms, **Gymno.:** Gymnosperm, **Pterido.:** Pteridophyte, **G-:** Gram-negative, **N/D:** Not Defined, **RT:** Room Temperature, **MD:** Monodispersed, **PD:** Polydispersed, **BTC:** Benzene to cyclohexane, **MTS:** Maleic acid to succinic acid, **NTA:** Nitro to amino, **MFC:** Methanol Fuel Cell, **NC:** Nanocatalysts, **SF:** Semi Fermented, **@(stir):** Activated by stirring, **@:** at/over, **NiF:** Ni foam, **BD:** Bulk Density, **P:** Porosity, **Avg.:** Average, **Ext.:** Extract, **Soln.:** Solution, **TOF:** Turn Over Frequency, **HERE:** Hydrogen Evolution Reaction Efficiency, **Op:** Overpotential, **CD:** Current Density, **ER:** Efflux Rate, **OERE:** Oxygen Evolution Reaction Efficiency, **DMF1:** dimethylformamide synthesis first, **DMF2:** dimethylformamide synthesis second, **DMF3:** dimethylformamide synthesis Third, **BB:** *Bacillus benzeovorans*, **EC:** *E. coli*, **DD:** *Desulphovibrio Desulphuricans*, **GC MS:** Gas Chromatography coupled Mass spectrometry, **GC FID:** Gas Chromatography coupled Flow Injection Detector.

*Note: References as mentioned in the main manuscript.*

**SD1. Tables regarding bioactive and catalytic of Ru-cNMs reported till 2019**

Table 1: Ru based nanomaterials synthesized through bioextracts, and their Biological characterizations

| Category             | Shrivastav <i>et al.</i> (2012)                                   | Gopinath <i>et al.</i> (2014)                                                                                                          | Kannan <i>et al.</i> (2015)                                                                                       | Ali <i>et al.</i> (2017)                                              |
|----------------------|-------------------------------------------------------------------|----------------------------------------------------------------------------------------------------------------------------------------|-------------------------------------------------------------------------------------------------------------------|-----------------------------------------------------------------------|
| Reducing entity      | Bacteria(G-), <i>Pseudomonas aeruginosa</i> SM1                   | Plant (Angio.), <i>Gloriosa superba</i>                                                                                                | Plant (Angio.), <i>Acalypha Indica</i>                                                                            | Algae, <i>Dictyota dichotoma</i>                                      |
| Phylogeny            | Pseudomonadaceae                                                  | Lilliaceae                                                                                                                             | Euphorbiaceae                                                                                                     | Dictyotaceae                                                          |
| Part used            | extracellular layers                                              | Dried Leaves                                                                                                                           | Dried Leaves                                                                                                      | Leaves & stems                                                        |
| Solvent              | Aqueous                                                           | Aqueous                                                                                                                                | Aqueous                                                                                                           | Aqueous                                                               |
| [Electrolyte]        | (NH <sub>4</sub> ) <sub>2</sub> [RuCl <sub>6</sub> ], 1 mM, 50 mL | RuCl <sub>3</sub> .xH <sub>2</sub> O, 2mM, 100 mL                                                                                      | RuCl <sub>3</sub> .xH <sub>2</sub> O, 0.1 M, 50 mL                                                                | Ru aq. solution, 2 mM, 90 mL                                          |
| Ext. preparation     | Nutrient broth, 27 °C, 120 rpm                                    | 0.1 g/mL, 50-60 °C, 5 min                                                                                                              | 0.2 g/mL, 50-60 °C, 30 min                                                                                        | Known weight, heated for 5 min                                        |
| [Ext.] used          | 0.2 g cell pellet                                                 | 1 mL                                                                                                                                   | 10 mL                                                                                                             | 10 mL                                                                 |
| Temp (°C), duration  | RT, 24 h                                                          | 100, 20 min                                                                                                                            | 80, 2 h                                                                                                           | RT, 10 min                                                            |
| Stir (rpm), duration | Static                                                            | Stirred                                                                                                                                | 1000, 10 min                                                                                                      | 12000, 20 min                                                         |
| Calcination          | N/D                                                               | N/D                                                                                                                                    | At 600 °C                                                                                                         | N/D                                                                   |
| NPs type             | Ru NPs                                                            | Ru NPs                                                                                                                                 | RuO <sub>2</sub> NPs                                                                                              | Ru NPs                                                                |
| NPs size (nm)        | 2.9-13.7                                                          | 25-90                                                                                                                                  | 6-25                                                                                                              | 25-90                                                                 |
| Dispersity           | PD                                                                | PD                                                                                                                                     | PD                                                                                                                | PD                                                                    |
| Lattice              | N/D                                                               | Hexagonal                                                                                                                              | Orthorhombic                                                                                                      | Cubic, FCC                                                            |
| Agglomerate          | No                                                                | Yes                                                                                                                                    | Yes                                                                                                               | No                                                                    |
| Nature               | Amorphous                                                         | Crystalline                                                                                                                            | Crystalline                                                                                                       | Crystalline                                                           |
| Shape                | Spheres and Disc                                                  | Spherical                                                                                                                              | Irregular                                                                                                         | Irregular                                                             |
| Bioactivity          | N/A                                                               | Antibacterial activity (against <i>P. aeruginosa</i> , <i>E. coli</i> , <i>S. aureus</i> , <i>S. pneumoniae</i> , <i>B. subtilis</i> ) | Antibacterial activity (against <i>E. coli</i> , <i>P. aeruginosa</i> , <i>S. aureus</i> , <i>S. marcescens</i> ) | Anticancer activity estimated against HeLa, MCF-7, ad VERO cell line. |
| Synthesis Mechanism  | 1°/2° amine mediated reduction                                    | Phenolics oxidation                                                                                                                    | Quinol/quinone conversion                                                                                         | N/D                                                                   |
| References           | [7]                                                               | [8a]                                                                                                                                   | [8b]                                                                                                              | [8c]                                                                  |

Table 1: Ru based nanomaterials synthesized through bioextracts, and their Biological characterizations (cont.)

| Category            | Gupta <i>et al.</i> (2019)                                |                                                     |                                                     |                                                     |
|---------------------|-----------------------------------------------------------|-----------------------------------------------------|-----------------------------------------------------|-----------------------------------------------------|
| Reducing entity     | Plant (Pterido.), <i>Nephrolepis biserrata</i><br>Furcans | Plant (Gymno.), <i>Cycas revoluta</i>               | Plant (Angio.), <i>Catharanthus roseus</i>          | Plant (Angio.), <i>Ocimum sanctum</i>               |
| Phylogeny           | Nephrolepidaceae                                          | Cycadaceae                                          | Apocynaceae                                         | Labiatae                                            |
| Part used           | Fresh Leaves                                              | Fresh Leaves                                        | Fresh Leaves                                        | Fresh Leaves                                        |
| Solvent             | Methanolic                                                | Methanolic                                          | Methanolic                                          | Methanolic                                          |
| [Electrolyte]       | RuCl <sub>3</sub> .xH <sub>2</sub> O, 2.4 mM, 40 mL       | RuCl <sub>3</sub> .xH <sub>2</sub> O, 2.4 mM, 40 mL | RuCl <sub>3</sub> .xH <sub>2</sub> O, 2.4 mM, 40 mL | RuCl <sub>3</sub> .xH <sub>2</sub> O, 2.4 mM, 40 mL |
| Ext. preparation    | 0.125 g/mL, 50 °C, 10 min                                 | 0.125 g/mL, 50 °C, 10 min                           | 0.125 g/mL, 50 °C, 10 min                           | 0.125 g/mL, 50 °C, 10 min                           |
| [Ext.] used         | 0.5 mL                                                    | 0.5 mL                                              | 0.5 mL                                              | 0.5 mL                                              |
| Temp (°C), duration | 50, sand bath, 35 min                                     | 50, sand bath, 35 min                               | 50, sand bath, 35 min                               | 50, sand bath, 35 min                               |
| Stir (rpm),         | 17800, 15 mins                                            | 17800, 15 mins                                      | 17800, 15 mins                                      | 17800, 15 mins                                      |

|                     |                                                             |                                           |                                                            |                                                            |
|---------------------|-------------------------------------------------------------|-------------------------------------------|------------------------------------------------------------|------------------------------------------------------------|
| duration            |                                                             |                                           |                                                            |                                                            |
| Calcination         | N/D                                                         | N/D                                       | N/D                                                        | N/D                                                        |
| NPs type            | Ru NPs                                                      | Ru NPs                                    | Ru NPs                                                     | Ru NPs                                                     |
| NPs size (nm)       | 25.96                                                       | 26.52                                     | 19.63                                                      | 20.92                                                      |
| Dispersity          | MD                                                          | MD                                        | MD                                                         | MD                                                         |
| Lattice             | Cubic, Primitive                                            | Cubic, Primitive                          | Cubic, Primitive                                           | Cubic, Primitive                                           |
| Agglomerate         | No                                                          | No                                        | Yes                                                        | No                                                         |
| Nature              | Amorphous                                                   | Polycrystalline                           | Crystalline                                                | Polycrystalline                                            |
| Shape               | Hexagonal                                                   | Spherical                                 | Irregular                                                  | Orthorhombic                                               |
| Bioactivity         | Significant Antifungal activity (against <i>A. flavus</i> ) | Minor Antifungal and antioxidant activity | Significant Antioxidant activity (DPPHS, ABTSS, SORS, HSA) | Significant Antioxidant activity (DPPHS, ABTSS, SORS, HSA) |
| Synthesis Mechanism | Flavonoid redox reaction                                    | Flavonoid redox reaction                  | Flavonoid redox reaction                                   | Flavonoid redox reaction                                   |
| References          | [9]                                                         |                                           |                                                            |                                                            |

Table 2: Ru based nanomaterials synthesized through bioextracts, and their Catalytic Potency

| Category                   | Huang <i>et al.</i> (2014) BTC                                         | Huang <i>et al.</i> (2015) MTS                                         | Ismail <i>et al.</i> (2016) WSR                                                                | Ismail <i>et al.</i> (2016) SCE                                                                       | Zhang <i>et al.</i> (2016) NTA                                                                                                   | Sano <i>et al.</i> (2016) MFC                                                                                                                          |
|----------------------------|------------------------------------------------------------------------|------------------------------------------------------------------------|------------------------------------------------------------------------------------------------|-------------------------------------------------------------------------------------------------------|----------------------------------------------------------------------------------------------------------------------------------|--------------------------------------------------------------------------------------------------------------------------------------------------------|
| Reducing entity            | Plant (Gymno.), <i>Cacumen platycladi</i>                              | Plant (Gymno.), <i>Cacumen platycladi</i>                              | Plant (Angio.), <i>Aspalathus linearis</i>                                                     | Plant (Angio.), <i>Aspalathus linearis</i>                                                            | Plant (Angio.), <i>Diospyros kaki</i>                                                                                            | Bacteria (G-), <i>Shewanella algae</i>                                                                                                                 |
| Phylogeny                  | Cupressaceae                                                           | Cupressaceae                                                           | Fabaceae                                                                                       | Fabaceae                                                                                              | Ebenaceae                                                                                                                        | Shewanellaceae                                                                                                                                         |
| Part used                  | Dried Leaves                                                           | Dried Leaves                                                           | Dried Leaves                                                                                   | Dried Leaves                                                                                          | Dried Leaves                                                                                                                     | Cultured microbe                                                                                                                                       |
| Solvent                    | Aqueous                                                                | Aqueous                                                                | Aqueous                                                                                        | Aqueous                                                                                               | Aqueous                                                                                                                          | Aqueous                                                                                                                                                |
| [Electrolyte]              | RuCl <sub>3</sub> .xH <sub>2</sub> O, 50 mL, 2.2 mM, @(stir) 60°C, 1 h | RuCl <sub>3</sub> .xH <sub>2</sub> O, 50 mL, 2.2 mM, @(stir) 60°C, 1 h | RuCl <sub>3</sub> .xH <sub>2</sub> O, added 6.0 g, pH maintained at 3.8                        | RuCl <sub>3</sub> .xH <sub>2</sub> O, added 6.0 g, pH maintained at 3.8                               | 0.5 mM RuCl <sub>3</sub> .xH <sub>2</sub> O+ 0.5 mM H <sub>2</sub> PtCl <sub>6</sub> .6H <sub>2</sub> O (40 mL), @(stir) RT, 1 h | 4.3 mM, 5 mL RuCl <sub>3</sub> .xH <sub>2</sub> O+ 5 mM, 15 mL H <sub>2</sub> PtCl <sub>6</sub> .6H <sub>2</sub> O (40 mL), @(stir) RT, 1 h            |
| Ext. preparation           | Milling of plant powder, 0.01 g/mL, Stir, RT, 4h                       | Milling of plant powder, 0.01 g/mL, Stir, RT, 4h                       | 1.6 x 10 <sup>-4</sup> g/mL, pH: 3, heat, 3 h, SF                                              | 1.6 x 10 <sup>-4</sup> g/mL, pH: 3, heat, 3 h, SF                                                     | Milling plant powder, 0.067g/mL, stored at 4°C                                                                                   | <i>S. algae</i> (ATCC51181) grown in TSB (aerobic)                                                                                                     |
| [Ext.] used                | 30 mL                                                                  | 30 mL                                                                  | 300 mL                                                                                         | 300 mL                                                                                                | 25 mL                                                                                                                            | N/D                                                                                                                                                    |
| Substrate used             | CNT, opt amt., heated with Ru solution, 60°C, 1 h                      | AC, opt amt., added after 0.5 h of the above reaction                  | Electrodeposition of NPs on Cu <sub>2</sub> O substrate due to its excitation energy of 2.1 eV | NiF (BD 450 g/m <sup>2</sup> , P: 95%, 1.6 mm thick), EtOH- Ru NPs doped over NiF, dried at 60°C, ½ h | HNO <sub>3</sub> treated CB, opt amt., added after the reaction, stir, RT, 1 h                                                   | CB,1:1(algae:CB)<br>A. Ext. added to Pt <sup>+</sup> +Ru <sup>+</sup> .<br>B. Ru <sup>+</sup> added to Pt <sup>+</sup> +Ext. Rate: 1cm <sup>3</sup> /h |
| Temperature (°C), duration | 60°C, 5 h. vaccum dried at 60°C:12 h                                   | 60°C, 5 h. vaccum dried at 60°C: 12 h                                  | RT, 2 h, heat at 90 °C, for 1h                                                                 | RT, 2 h, heat at 90 °C, for 1h                                                                        | RT, 2 h                                                                                                                          | pH: 7 via H <sub>3</sub> PO <sub>4</sub> buffer, 50 mol/mL COONa added to Pt <sup>+</sup> soln.                                                        |
| Stir (rpm), duration       | Stir, 5 h                                                              | Stir, 5 h                                                              | 1000, 3 times, 10 min each                                                                     | 1000, 3 times, 10 min each                                                                            | Stir, 2 h                                                                                                                        | NPs Electrode in DMFC and                                                                                                                              |

|                                          | compared                                                                                                  |                                                                                             |                                                                                                |                                                                        |                                                                                               |                                                                                                   |
|------------------------------------------|-----------------------------------------------------------------------------------------------------------|---------------------------------------------------------------------------------------------|------------------------------------------------------------------------------------------------|------------------------------------------------------------------------|-----------------------------------------------------------------------------------------------|---------------------------------------------------------------------------------------------------|
| <b>Calcination/<br/>Anealling</b>        | 500°C, 3 h,<br>N <sub>2</sub><br>atmosphere                                                               | 500°C, 3 h, N <sub>2</sub><br>atmosphere                                                    | Anealling for 2 h<br>at 400 °C                                                                 | Anealling for 2 h<br>at 400 °C                                         | 300°C, 2 h.<br>Reduced with H <sub>2</sub><br>at 250°C for 3 h                                | N/A                                                                                               |
| <b>S<sub>BET</sub> (m<sup>2</sup>/g)</b> | 197                                                                                                       | 949                                                                                         | 137.1                                                                                          | N/D                                                                    | 878                                                                                           | N/D                                                                                               |
| <b>V<sub>p</sub> (cm<sup>2</sup>/g)</b>  | 0.93                                                                                                      | 0.94                                                                                        | N/D                                                                                            | N/D                                                                    | 0.35                                                                                          | N/D                                                                                               |
| <b>R<sub>p</sub> (nm)</b>                | 18.6                                                                                                      | 0.4                                                                                         | N/D                                                                                            | N/D                                                                    | 5.6                                                                                           | N/D                                                                                               |
| <b>NPs type</b>                          | Ru<br>NPs@CNT<br>catalyst                                                                                 | Ru NPs@AC<br>catalyst                                                                       | RuO <sub>2</sub><br>NPs@Cu <sub>2</sub> O/ ITO-<br>Gs                                          | RuO <sub>2</sub> NPs@NiF                                               | Ru <sub>0.5</sub> Pt <sub>0.5</sub><br>NAs@OAC                                                | Pt <sub>x</sub> Ru <sub>1-x</sub><br>NAs@CB                                                       |
| <b>NPs/NCs size<br/>(nm)</b>             | 3.3-5.5                                                                                                   | 2.17                                                                                        | 1.4-1.3                                                                                        | 5                                                                      | 4-11 (Avg. 7.21)                                                                              | <5 nm                                                                                             |
| <b>Dispersity</b>                        | PD                                                                                                        | MD                                                                                          | PD                                                                                             | MD                                                                     | PD                                                                                            | MD                                                                                                |
| <b>Lattice</b>                           | N/D                                                                                                       | N/D                                                                                         | Rutile                                                                                         | N/D                                                                    | N/D                                                                                           | Hexagonal                                                                                         |
| <b>Agglomerate</b>                       | No                                                                                                        | No                                                                                          | No                                                                                             | No                                                                     | No                                                                                            | No                                                                                                |
| <b>Nature</b>                            | Amorphous                                                                                                 | Amorphous                                                                                   | Amorphous                                                                                      | Amorphous                                                              | Single-phase<br>Crystalline                                                                   | Crystalline                                                                                       |
| <b>Shape</b>                             | Spherical                                                                                                 | Irregular                                                                                   | Spherical                                                                                      | Spherical                                                              | Quasi-spherical                                                                               | Ellipsoidal                                                                                       |
| <b>Synthesis<br/>Mechanism</b>           | Redox<br>Mechanism                                                                                        | Redox<br>Mechanism                                                                          | Quinol/quinone<br>conversion                                                                   | Quinol/quinone<br>conversion                                           | Redox<br>mechanism                                                                            | Redox<br>mechanism                                                                                |
| <b>Catalysis</b>                         | Catalytic<br>reduction of<br>Benzene to<br>cyclohexane                                                    | Catalytic<br>reduction of<br>maleic acid to<br>succinic acid                                | Water Splitting<br>Reaction                                                                    | Supercapacitor<br>and electrode                                        | Catalytic<br>reduction of<br><i>o</i> -chloronitro-<br>benzene to<br><i>o</i> -chloroanilline | Used in as<br>anode in DMFC                                                                       |
| <b>Catalysis<br/>conditions</b>          | Ru loading<br>2% (w/w):<br>0.05 g, 80°C,<br>4 MPa N <sub>2</sub> ,<br>0.5 h, solid<br>state<br>synthesis. | Ru loading 2%<br>(w/w): 0.05 g,<br>150°C, 6 MPa<br>H <sub>2</sub> , 0.5 h,<br>Solvent: THF. | Electrode:Ru<br>over Cu <sub>2</sub> O<br>coating over ITO<br>layer over the<br>glass surface. | Electrode<br>prepared for this<br>material.                            | 0.5 g of 1:1<br>(Ru:Pt), 50°C, 1<br>MPa H <sub>2</sub>                                        | Incorporated in<br>electrodes of<br>DMFC with CB,<br>RT                                           |
| <b>Catalytic<br/>efficiency</b>          | Conversion:<br>99.97%<br>TOF: 6983/h<br>Recycle: 6<br>times                                               | Conversion:<br>99.4%<br>Selectivity:<br>99.6%<br>TOF: 2084.9/h<br>Recycle: 5<br>times       | Stoichiometric<br>amounts of H <sub>2</sub> &<br>O <sub>2</sub> in 227 h                       | 97% of<br>capacitance lost<br>after 500<br>charge/discharge<br>cycles. | Conversion:<br>99.8%<br>Selectivity: 98.4%<br>Rate: 0.26<br>Recycle: 5 times                  | A. Poisoning<br>reactivated<br>after 10<br>min, avg.<br>potential<br>0.04 V<br>B. Pt<br>poisoning |
| <b>References</b>                        | [59a]                                                                                                     | [59b]                                                                                       | [45a]                                                                                          | [10]                                                                   | [56]                                                                                          | [11]                                                                                              |

Table 2: Ru based nanomaterials synthesized through bioextracts, and their Catalytic Potency(Cont.)

| Category                   | Yu <i>et al.</i><br>(2019) WSR                                                                         | Omajali <i>et al.</i><br>(2019) DMF1                                                                                   | Mikheenko <i>et al.</i><br>(2019)DMF2                                                                                  | Bolivar <i>et al.</i><br>(2019) DMF2                                                                                   |
|----------------------------|--------------------------------------------------------------------------------------------------------|------------------------------------------------------------------------------------------------------------------------|------------------------------------------------------------------------------------------------------------------------|------------------------------------------------------------------------------------------------------------------------|
| <b>Reducing<br/>entity</b> | Fungi, <i>Saccharomycete</i> sp.                                                                       | Bacteria (G+)<br><i>Bacillus benzeovorans</i>                                                                          | Bacteria (G-)<br><i>Desulphovibrio<br/>desulphuricans</i>                                                              | Bacteria (G-)<br><i>Escherichia coli</i><br>MC4100                                                                     |
| <b>Phylogeny</b>           | Saccharomycetaceae                                                                                     | Bacillaceae                                                                                                            | Desulphovibrionaceae                                                                                                   | Enterobacteriaceae                                                                                                     |
| <b>Part used</b>           | Dried cell mass                                                                                        | Dried cell mass                                                                                                        | Dried cell mass                                                                                                        | Dried cell mass                                                                                                        |
| <b>Solvent</b>             | Aqueous                                                                                                | Aqueous                                                                                                                | Aqueous                                                                                                                | Aqueous                                                                                                                |
| <b>[Electrolyte]</b>       | 0.1 M, 0.5 mL RuCl <sub>3</sub> .xH <sub>2</sub> O added to<br>the <i>Saccharomycete</i> cell solution | 2 mM H <sub>2</sub> PdCl <sub>4</sub> + 1 mM<br>RuCl <sub>3</sub> .xH <sub>2</sub> O (pH=2,<br>10mM HNO <sub>3</sub> ) | 2 mM H <sub>2</sub> PdCl <sub>4</sub> + 1 mM<br>RuCl <sub>3</sub> .xH <sub>2</sub> O (pH=2,<br>10mM HNO <sub>3</sub> ) | 2 mM H <sub>2</sub> PdCl <sub>4</sub> + 1<br>mM RuCl <sub>3</sub> .xH <sub>2</sub> O<br>(pH=2, 10mM HNO <sub>3</sub> ) |

|                                          |                                                                                                                                   |                                                                                                                                                  |                                                                                                                                                  |                                                                                                                                                  |
|------------------------------------------|-----------------------------------------------------------------------------------------------------------------------------------|--------------------------------------------------------------------------------------------------------------------------------------------------|--------------------------------------------------------------------------------------------------------------------------------------------------|--------------------------------------------------------------------------------------------------------------------------------------------------|
| <b>Ext. preparation</b>                  | 3.33 x 10 <sup>-3</sup> g/mL <i>Saccharomycete</i> cells                                                                          | Strain grown to OD <sub>600</sub> :0.7-1.0, centrifuge:9000 g, 15 min, 4°C.                                                                      | Strain grown to OD <sub>600</sub> :0.7-1.0, centrifuge:9000 g, 15 min, 4°C.                                                                      | Strain grown to OD <sub>600</sub> :0.7-1.0, centrifuge:9000 g, 15 min, 4°C.                                                                      |
| <b>[Ext.] used</b>                       | 30 mL                                                                                                                             | As per (% w/w) ratio                                                                                                                             | As per (% w/w) ratio                                                                                                                             | As per (% w/w) ratio                                                                                                                             |
| <b>Substrate used</b>                    | N/P Doped Carbon substrate                                                                                                        | Cell biomass was used as NPs support                                                                                                             | Cell biomass was used as NPs support                                                                                                             | Cell biomass was used as NPs support                                                                                                             |
| <b>Temperature (°C), duration</b>        | Gentle heating at 30° C, 24 h to form grey Ru- <i>Saccharomycete</i> cell                                                         | 30°C, 96 h                                                                                                                                       | 30°C, 96 h                                                                                                                                       | 30°C, 96 h                                                                                                                                       |
| <b>Stir (rpm), duration</b>              | Stir under dark for 24 h                                                                                                          | 180 rpm                                                                                                                                          | 180 rpm                                                                                                                                          | 180 rpm                                                                                                                                          |
| <b>Calcination/ Annealing</b>            | Ar/H <sub>2</sub> environment, at 900°C rate: 2°C/min, 2 h                                                                        | Aerial, at 500°C rate: 2°C/min, 2 h                                                                                                              | N/D                                                                                                                                              | N/D                                                                                                                                              |
| <b>S<sub>BET</sub> (m<sup>2</sup>/g)</b> | 617.85                                                                                                                            | 166.34                                                                                                                                           | N/D                                                                                                                                              | N/D                                                                                                                                              |
| <b>V<sub>p</sub> (cm<sup>2</sup>/g)</b>  | N/D                                                                                                                               | N/D                                                                                                                                              | N/D                                                                                                                                              | N/D                                                                                                                                              |
| <b>R<sub>p</sub> (nm)</b>                | N/D                                                                                                                               | N/D                                                                                                                                              | N/D                                                                                                                                              | N/D                                                                                                                                              |
| <b>NPs type</b>                          | Ru/Ru <sub>2</sub> P NPs@NPC                                                                                                      | RuO <sub>2</sub> NPs NPs@NPC                                                                                                                     | RuPd NPs@EC                                                                                                                                      | RuPd NPs@DD                                                                                                                                      |
| <b>NPs/NCs size (nm)</b>                 | 7000-6000                                                                                                                         | 2000-3000                                                                                                                                        |                                                                                                                                                  | 2-3 nm                                                                                                                                           |
| <b>Dispersity</b>                        | PD                                                                                                                                | PD                                                                                                                                               | PD                                                                                                                                               | PD                                                                                                                                               |
| <b>Lattice</b>                           | Ru: Hexagonal<br>Ru <sub>2</sub> P: orthorhombic                                                                                  | Rutile                                                                                                                                           | N/D                                                                                                                                              | N/D                                                                                                                                              |
| <b>Agglomerate</b>                       | No                                                                                                                                | Occasionally                                                                                                                                     | Occasionally                                                                                                                                     | Occasionally                                                                                                                                     |
| <b>Nature</b>                            | Crystalline                                                                                                                       | Polycrystalline                                                                                                                                  | Amorphous                                                                                                                                        | Amorphous                                                                                                                                        |
| <b>Shape</b>                             | Spherical                                                                                                                         | Mixed                                                                                                                                            | Mixed                                                                                                                                            | Mixed                                                                                                                                            |
| <b>Synthesis Mechanism</b>               | Redox mechanism                                                                                                                   | Bioreduction and redox mechanism                                                                                                                 | Bioreduction and redox mechanism                                                                                                                 | Bioreduction and redox mechanism                                                                                                                 |
| <b>Catalysis</b>                         | Catalyze Water Splitting Reaction in acidic medium                                                                                | Catalyze conversion of 5-hydroxymethyl furfural (HMF) to 2,5-dimethyl furfural (DMF)                                                             | Catalyze conversion of 5-hydroxymethyl furfural (HMF) to 2,5-dimethyl furfural (DMF)                                                             | Catalyze the up-gradation of 5-hydroxymethyl furfural (HMF) to 2,5-dimethyl furfural (DMF) obtained from biowastes.                              |
| <b>Catalysis conditions</b>              | 0.5 M H <sub>2</sub> SO <sub>4</sub> soln.,                                                                                       | 2.5:1 (w/w) 5-HMF:catalyst, H <sub>2</sub> purge, H <sub>2</sub> pressure (50 bar), 2h, 260°C, 500 rpm, stored at -20°C, filtered, GC-FID, GC-MS | 2.5:1 (w/w) 5-HMF:catalyst, H <sub>2</sub> purge, H <sub>2</sub> pressure (50 bar), 2h, 260°C, 500 rpm, stored at -20°C, filtered, GC-FID, GC-MS | 2.5:1 (w/w) 5-HMF:catalyst, H <sub>2</sub> purge, H <sub>2</sub> pressure (50 bar), 2h, 260°C, 500 rpm, stored at -20°C, filtered, GC-FID, GC-MS |
| <b>Catalytic efficiency</b>              | HERE: high, Op: 42 mV@10 mA cm <sup>-2</sup> , CD: 1000 mA cm <sup>-2</sup> , Tafel Slope: 37.5 mV dec <sup>-1</sup>              | OERE: medium, Op: 220 mV@10 mA cm <sup>-2</sup> , CD: 1000 mA cm <sup>-2</sup> , Tafel Slope: 66.8 mV dec <sup>-1</sup>                          | Conversion: 100%<br>Selectivity: <50%                                                                                                            | Conversion: 100%<br>Selectivity: >50%                                                                                                            |
|                                          | Cell Notation:<br>Ru/Ru <sub>2</sub> P NPs@NPC(-)    RuO <sub>2</sub> NPs@NPC(+)<br>Needed 1.5 V to attain 10 mA cm <sup>-2</sup> |                                                                                                                                                  |                                                                                                                                                  |                                                                                                                                                  |

|            |      |       |       |       |
|------------|------|-------|-------|-------|
| References | [55] | [19a] | [104] | [19b] |
|------------|------|-------|-------|-------|

## SD2. Table depicting tentative synthesis mechanism of green Ru-cNMs

Table 3: Plant extract based synthesis of Ru-cNMs and tentative mechanism for their reaction

| S.No. | Ru-cNMs                                         | Plant Extract                                | Tentative synthesis strategy                                                                                                                                                                | Ref. |
|-------|-------------------------------------------------|----------------------------------------------|---------------------------------------------------------------------------------------------------------------------------------------------------------------------------------------------|------|
| 1.    | Ru NPs                                          | <i>Gloriosa superba</i><br>(Aqueous)         | <p>Stigmasterol <math>\xrightarrow[\text{HCl}]{\text{H}^+ \text{Ru}^{+3}}</math> <math>\xrightarrow[\text{HCl}]{\text{H}^+ \text{Ru}^{+3}}</math> Stigmasterone</p>                         | [8a] |
| 2.    | RuO <sub>2</sub> NPs                            | <i>Acalypha indica</i><br>(Aqueous)          | <p>Acalyphamide <math>\xrightarrow[\text{HCl}]{\text{H}^+ \text{Ru}^{+3}}</math> <math>\xrightarrow[\text{HCl}]{\text{H}^+ \text{Ru}^{+3}}</math> RuO<sub>2</sub> NPs</p>                   | [8b] |
| 3.    | Ru NPs                                          | <i>Dictyota dichotoma</i><br>(Aqueous)       | <p>Dictyol C <math>\xrightarrow[2 \text{ HCl}]{2 \text{ H}^+ \text{Ru}^{+3}}</math> <math>\xrightarrow[2 \text{ HCl}]{2 \text{ H}^+ \text{Ru}^{+3}}</math> Dicty-di-one C</p>               | [8c] |
| 4.    | Ru NPs                                          | <i>Catharanthus roseus</i><br>(Methanolic)   | <p>Rosmarinic Acid <math>\xrightarrow[\text{HCl}]{\text{H}^+ \text{Ru}^{+3}}</math> <math>\xrightarrow[\text{HCl}]{\text{H}^+ \text{Ru}^{+3}}</math> Ru NPs</p>                             | [11] |
| 5.    | Ru NPs                                          | <i>Ocimum tenuiflorum</i><br>(Methanolic)    | <p>Eugenol <math>\xrightarrow[\text{HCl}]{\text{H}^+ \text{Ru}^{+3}}</math> <math>\xrightarrow[\text{HCl}]{\text{H}^+ \text{Ru}^{+3}}</math> Ru NPs</p>                                     | [11] |
| 6.    | Ru NPs                                          | <i>Nephrolepis biserrata</i><br>(Methanolic) | <p>Kaempherol <math>\xrightarrow[\text{HCl}]{\text{H}^+ \text{Ru}^{+3}}</math> <math>\xrightarrow[\text{HCl}]{\text{H}^+ \text{Ru}^{+3}}</math> Ru NPs</p>                                  | [11] |
| 7.    | Ru NPs                                          | <i>Cycas revoluta</i><br>(Methanolic)        | <p>Tannin moiety <math>\xrightarrow[\text{HCl}]{\text{H}^+ \text{Ru}^{+3}}</math> <math>\xrightarrow[\text{HCl}]{\text{H}^+ \text{Ru}^{+3}}</math> Ru NPs</p>                               | [11] |
| 8.    | Ru NPs@AC<br>and<br>Ru NPs@CNT                  | <i>Cacumen platycladi</i><br>(Aqueous)       | <p>Myricitrin <math>\xrightarrow[\text{HCl}]{\text{H}^+ \text{Ru}^{+3}}</math> <math>\xrightarrow[\text{HCl}]{\text{H}^+ \text{Ru}^{+3}}</math> Ru NPs@AC and Ru NPs@CNT</p>                | [59] |
| 9.    | Ru <sub>0.5</sub> Pt <sub>0.5</sub> NPs<br>@OAC | <i>Diospyros kaki</i><br>(Aqueous)           | <p>Myricetin <math>\xrightarrow[\text{HCl}]{\text{H}^+ \text{Ru}^{+3}}</math> <math>\xrightarrow[\text{HCl}]{\text{H}^+ \text{Ru}^{+3}}</math> Ru<sub>0.5</sub>Pt<sub>0.5</sub> NPs@OAC</p> | [56] |

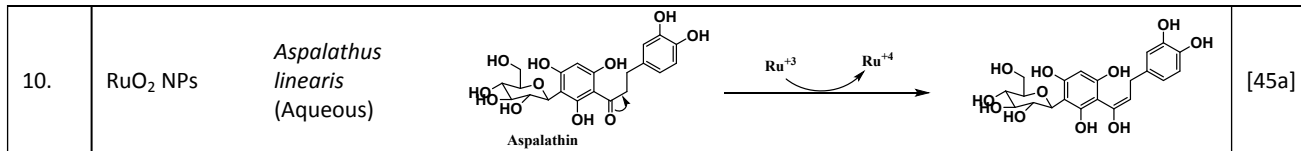

### SD3. Tauc's Relation and calculation of Optical band gap

Absorption coefficient ( $\epsilon$ ) and Optical density ( $OD = \alpha = \epsilon \cdot c$ , where  $c$  is the concentration of NPs solution) for the vortexed solution of amorphous NPs are used to calculate optical band gap ( $E_g$ ) by knowing the photonic energy ( $h\nu$ ) as,

$$[(\alpha - \alpha_s)h\nu]^{1/n} = \beta(h\nu - E_g)$$

which is called Tauc relation, where  $\alpha_s$  is the minimum absorption coefficient of solvent,  $\beta$  is band tailing parameter, and  $n$  is power factor (equivalent to 1/2, 3/2, 2, or 3 for direct allowed, direct forbidden, indirect allowed and indirect forbidden transitions) respectively [70]. Tauc plots, drawn between  $[(\alpha - \alpha_s)h\nu]^{1/n}$  and  $h\nu$ , for different values of  $n$  and their extrapolation up to  $[(\alpha - \alpha_s)h\nu]^{1/n} = 0$  is used to deduce  $E_g$  and  $\beta$  for these transitions.

### SD4. Atomic Surface Concentration Ratio (ASCR)

Atomic surface concentration ratio (ASCR) can be semi-quantitatively calculated as,

$$\frac{C_O}{C_{Ru}} = \frac{A_O/S_O}{A_{Ru}/S_{Ru}}$$

where  $C$  is the atomic surface concentration of the given species,  $A$  is absorption peak width for a particular species, and  $S$  is the sensitivity with respect to the orbitals of a particular atom (for O 1s  $S_O = 2.93$ , and for Ru 3d<sub>5/2</sub>  $S_{Ru} = 7.39$ ).

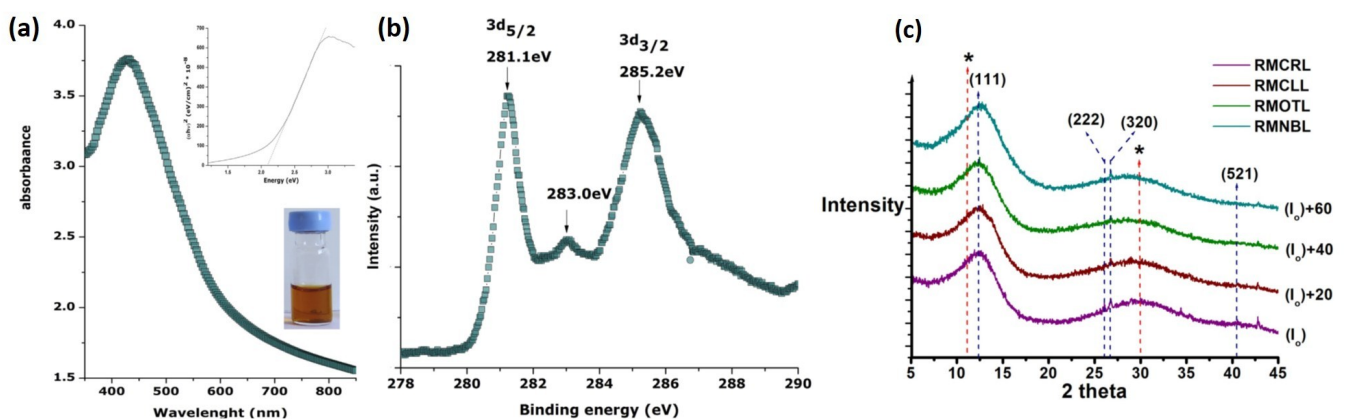

**Figure 1:** (a, b) UV-Vis-NIR (with Tauc plot as inset) and Ru core XPS spectra of RuO<sub>2</sub> NPs synthesized using aqueous leaf extracts of *Aspalathus linearis* <sup>45a</sup> (c) Powder XRD spectra of Ru NPs (RCRL, RMOTL, RMCLL, and RMNBL) synthesized using methanolic extracts of *Catharanthus roseus*, *Ocimum tenuiflorum*, *Cycas revoluta*, and *Nephrolepis biserrata* respectively <sup>9</sup>

### SD5. Williamson Hall Equation

XRD methods use Debye Scherrer formula for particle size calculation owing to particle size broadening

$$\beta_{sz} = 0.9\lambda / D \cos \theta$$

However, Ru NPs being synthesized from plant extracts are smaller in size (<10 nm) and have high surface activity, owing to which they offer non-ideal peak broadening complicating deduction of crystal parameters. This additional peak broadening owing to excessive shear strain ( $\beta_{st} = 4 \varepsilon \tan \theta$ ) can be dealt through the Williamson Hall plot i.e., the plot of  $\beta_{tot} \cos \theta$  against  $C \sin \theta$ , in accordance to,

$$\beta_{tot} \cos \theta = K\lambda / D + (C \sin \theta) \varepsilon$$

where,  $\beta_{tot}$ ,  $\theta$ ,  $\lambda$ ,  $D$ , and  $\varepsilon$  are total peak broadening (rad), Bragg's diffraction angle, wavelength (1.540 Å), particle size (Å), and shear strain.  $K$  and  $C$  are constants equal to 0.9 and 4.00 respectively. The plot has been used to calculate  $D$  and  $\varepsilon$ .

$$\beta_{tot} \cos \theta = K\lambda / D + \left( C \sin \theta / E_{hkl} \right) \sigma$$

$$\beta_{tot} \cos \theta = K\lambda / D + \left( C \sin \theta \sqrt{\frac{2}{E_{hkl}}} \right) \sqrt{u}$$

Furthermore, the magnitude of strain can be used to calculate stress ( $\sigma$ ), and energy density ( $u$ ) if the value of Young's Modulus ( $E_{hkl}$ ) is known. This strain originated deviation can be deduced through the Williamson Hall plot. The magnitude of deviation obtained for ZnO and RuO<sub>2</sub> NPs has been used to calculate particle size, stress, and energy density of NPs. Uncalcined RuO<sub>2</sub> NPs show rutile structure, with undefined lattice. On calcination, NPs re-nucleate with a homogeneous lattice. Band displacement and reduction of lattice parameters confirm the synthesis of bimetallic NPs. The presence or absence of Ru broad peak at 43° is dependent on alloying efficiency. Presence of this peak in Ru<sub>x</sub>M<sub>x</sub> systems confirms the partial dissolution of metal (M) into Ru lattice. RuPt NPs of this type show minor peaks confirming Ru-Pt alloying. In Ru<sub>x</sub>M<sub>y</sub> (Ru<sub>x</sub>Pt<sub>y</sub>) systems these characteristics aren't visible, confirming the

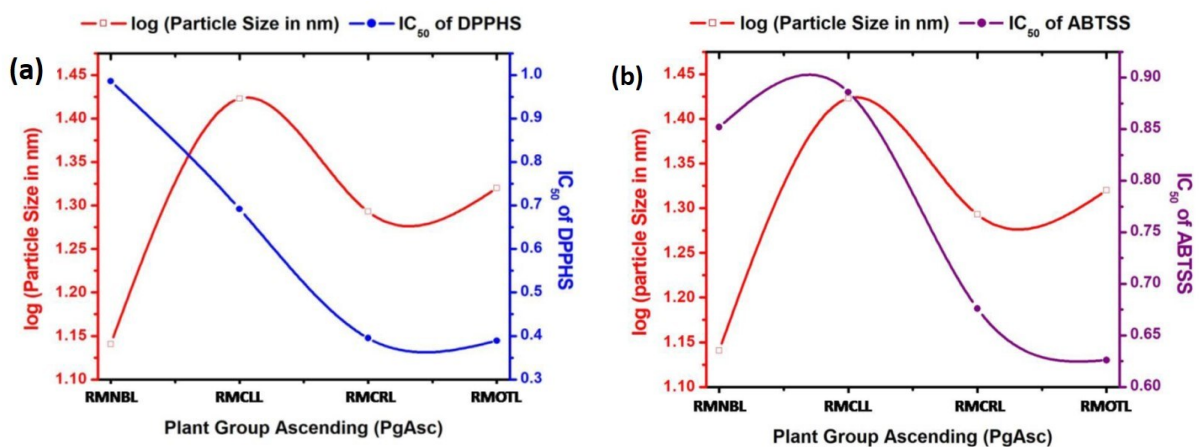

**Figure 2:** Nanoparticle-Plant group correlation Plot of Ru NPs(RCRL, RMOTL, RMCLL, and RMNBL) synthesized using methanolic extracts of *Catharanthus roseus*, *Ocimum tenuiflorum*, *Cycas revoluta*, and *Nephrolepis biserrata* representing (a) DPPH scavenging and (b) ABTS scavenging assays<sup>9</sup>



presence of metallic Ru metal and unalloyed metal NPs. In mixed ( $\text{Ru}_x\text{M}_x+\text{Ru}_x\text{M}_y$ ) systems broadband of Ru may or may not be visible depending upon alloying efficiency.

### SD6. X-Ray Absorption Spectroscopy and X-ray Absorption Near Edge Spectroscopy (XAS and XANES)

Dry samples of metal NPs, are analysed and processed using ATHENA code with irradiation of background through pre-edge linear function. EXAFS fitting is done via a shift in threshold energy and amplitude factor, as a universally fixed parameter, using FEFF8 calculations. In the case of Ru NPs,  $\text{RuO}_2$ ,  $\text{RuCl}_3$ , and Ru foil are used as reference materials. FEFF8 calculations of Pd-K edge data revealed the tetragonal PdO like crystal structure of Pd coordinated with 2 different oxygen atoms (with bond lengths 2.1 and 2.5 Å) of biological origin (particularly of Asp or Glu residues of capping proteins), and with another four distinct Pd atoms (with bond length varying from 2.74 to 5.40 Å). Similar calculations revealed the both metallic Ru and  $\text{RuO}_2$  shells were indistinguishably present in NPs with 1 Ru-Ru bond and 2 distinct Ru-O bonds (of bond lengths 1.96-2.04 and 2.10-2.16 Å respectively), originated from  $\text{RuO}_2$  and  $\text{Ru(OH)}_3$ , respectively. However, the geometry of Ru centre remained undefined due to nearly similar atomic number of Ru and Pd and low concentration of Ru in RuPd NPs.

### SD7. Electron Diffraction Spectroscopy (EDAX)

As per Bolivar *et al.* Elemental mapping of low Ru concentration confirmed uniform distribution of Pd, surface enrichment of Ru, and intracellular deposition of Ru NPs. They showed the presence of Pd(0) [111] lattice fringes (0.24 nm), but no defined fringes of Ru owing less Ru to Pd association in NPs. High Ru concentration bio RuPd NPs had both small and large-sized intracellular NPs, the later containing Pd. These bimetallic NPs showed core-shell and dumbbell shell the structure with Pd(0) [111] lattice fringes (0.236 nm),  $\text{RuO}_2$  [110] lattice fringe (0.231 nm) and  $\text{Ru(0)[101]/RuO}_2$  [210] lattice fringe (0.201 nm). Unlike high contrasting Z images of AuPd NPs ( $Z_{\text{Au}} = 79$ ,  $Z_{\text{Pd}} = 46$ ), Z images of RuPd NPs ( $Z_{\text{Ru}} = 44$ ) are of low contrasts owing to similar atomic numbers of Ru and Pd.

### SD8. Brunauer Emmet Teller (BET) plots and measurement of other surface parameters

BET surface area is estimated through  $\text{N}_2$  physisorption process in accordance with the formula,

$$\frac{p}{v(p_o - p)} = \frac{1}{v_m c} + \left( \frac{c - 1}{v_m c} \right) \frac{p}{p_o}$$

Where  $p$ ,  $p_o$ ,  $v$ ,  $v_m$ , and  $c$  are, sample's vapour pressure, solvent's vapour pressure, adsorbent's volume, monolayer volume and a relative lifetime of states ( $e^{(E-L)/RT}$ ,  $E$  and  $L$  are enthalpy of adsorption and latent heat of condensation)

respectively. The plot of relative partial pressure ( $p/p_o$ ) against the pressure fraction (i.e.  $\frac{p}{v(p_o - p)}$ ) has been used

to estimate  $c$  and  $v_m$ . Specific surface area ( $S_{BET} = \frac{v_m N_a A_{cs}}{M w}$ ) can be estimated whereby,  $N_a$ ,  $A_{cs}$ ,  $M$ , and  $w$  are Avogadro's number ( $6.02 \times 10^{23}$ ), cross-sections area of adsorbate ( $16.2 \text{ Å}^2$  for  $\text{N}_2$ ), the molecular weight of adsorbate ( $28.0134 \text{ g/mol}$  for  $\text{N}_2$ ), and sample weight respectively. Detailed knowledge of isotherms have been used

to calculate pore volume ( $V_p = \frac{P_a v_m V_M}{R T}$ ), pore radius ( $R_p = \frac{2V_p}{S}$ ), whereby,  $P_a$ ,  $V_m$ ,  $R$ ,  $T$ , and  $S$  are ambient pressure, molar volume, gas constant, ambient temperature, and total surface area ( $S_t = S_{BET} \times w$ ). Carbon nanotube (CNT) doped green Ru-cNMs have shown type IV adsorption isotherm with a decrease in  $S_{BET}$  and  $V_p$ , confirming their

mesoporous nature. An increment of  $R_p$  from 15.3 to 19.7 nm is attributed to concentration-based, pore extension ability of these NPs

### SD9. Electrochemical measurements

The working potential of metal NSs electrode can be estimated through Galvanostatic Charge Discharge (GCD) measurements, within a suitable potential range, carried over various current densities. The shape of the galvanostatic charge-discharge curve can be used to coin the energy storage mechanism in supercapacitive systems. Capacitors show a sharp decrement in their potential with the lowest potential limit of 0 V, i.e., for such systems,  $V_1 > V_2$ , and  $V_2 = 0$ . Unlike this, Pseudo-capacitors systems give show a decremental curve only after a consistent potential plateau, even at different current densities with low iR drop, such that the lowest potential limit is never equal to zero, i.e, for these systems,  $V_1 > V_2$ , but  $V_2 \neq 0$ . Owing to its recurrent adsorption-desorption activity, transition metal NPs mostly show pseudocapacitive behaviour. Specific capacitance (C), i.e., capacitance offered per mg of Ru-cNMs ( $F\ mg^{-1}$ ) can be calculated from,

$$C = \frac{(\Delta Q/\Delta V)}{w} = \frac{I \Delta t}{w \Delta V}$$

where,  $Q$ ,  $I$ ,  $\Delta t$ ,  $w$ , and  $\Delta V$  are charging-discharging charge(mC), charge-discharge current(mA), discharging time(s) and amount of metal NSs(mg). The gradual decrease in specific capacitance on increasing current density can be attributed to insufficient and incremental potential drop along with the involvement of active material in redox reactions at higher charge densities. This technique is also a semi-qualitative confirmation of NSs-substrate interaction and NPs's supercapacitive nature.

Randles electronic equivalent circuit consisting of combined series resistance ( $R_s$ ) corresponding to electrode's ionic resistance and contact resistance at active substance/current collector interface, and a parallel combination of charge transfer resistance ( $R_{ct}$ ) and constant phase element (CPE). CPE includes both, the double layer electrode capacitance and ideal polarizable capacitance. The real to imaginary intersection point at high frequency and slope of the Nyquist plot at low frequency corresponds to  $R_s$  and  $W$  respectively. The actual deviation found between real and imaginary impedance is attributed to the additional Warburg resistance ( $W$ ) owing to the diffusion of counterion. Low  $R_s$  and low  $R_{ct}$  values confirm the biosynthesis strategy and good electrical conductivity of Ru-cNMs.

Impedance of the constant phase element of Randles's circuit ( $Z_{CPE}$ ) can be calculated from:

$$Z_{CPE} = \frac{1}{D(k\omega)^n}$$

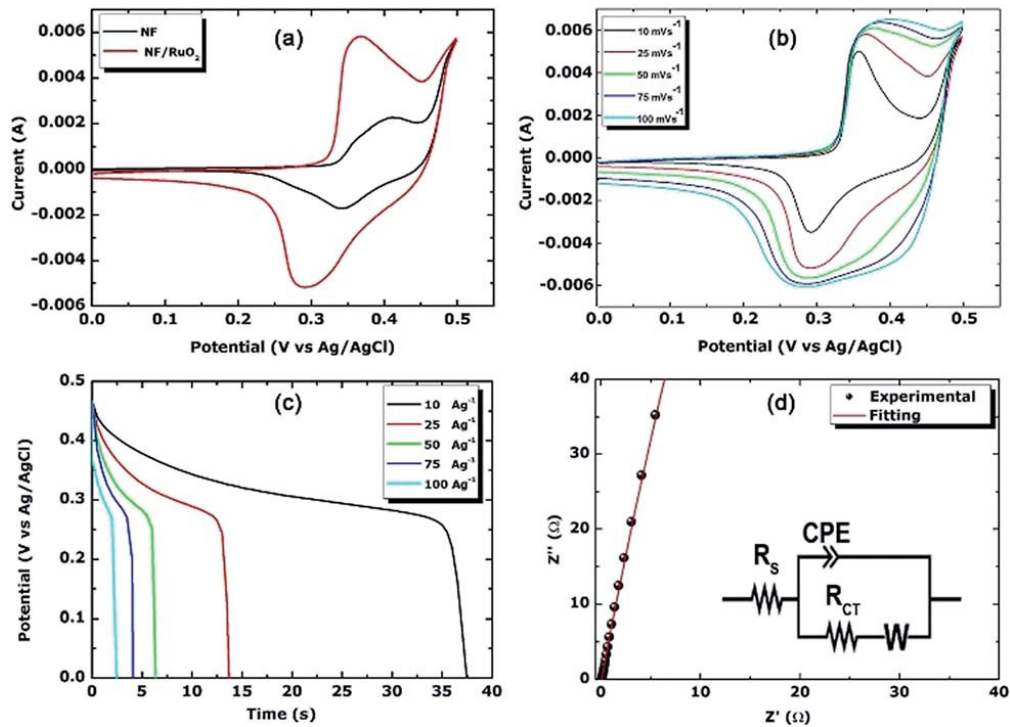

**Figure 3:** (a, b) Cyclic Voltammetric spectra of RuO<sub>2</sub> (RuO) and NiF coated RuO<sub>2</sub> NPs over various scan rates (c) Galvanostatic Charge/Discharge (GCD) plots over various NPs concentration (in grams) (d) Experiment (dot) and fitted (red line) Nyquist Plot and Randle's equivalent circuit for RuO<sub>2</sub> NPs synthesized using aqueous extract of *Aspalathus linearis*<sup>10</sup>

where,  $D$ ,  $k$ ,  $\omega$ , and  $n$  refers to the combined surface and electroactive property coefficient, capacitive (C) or inductive (L) magnitude, angular frequency and capacitor kinetics-electrode roughness correlation factor, respectively. Value of  $n$  can vary from 1 (for ideal capacitor) to -1 (for ideal inductor). Value of  $n$  corresponds to 0 for an ideal resistor, and 0.5 is assigned to diffusion phenomena. Photoreduction efficiency is measured using gas chromatographic techniques.

### SD10. Electronic Setup of Direct Methanol Fuel Cell (DMFC)

Ru-Pt DMFC systems, proposed for preventing CO mediated Pt inactivation, have been prepared and tested through experimental DMFC setup. In this cell, crushed reductant carbon paper mixture in the ratio of 1:2 was prepared and used for preparing electrodes, which were separated by proton conductive solid media like Nafion117 membrane. The membrane electrode assembly (MEA) was prepared by hot-pressing. The MEA and Nafion117 membrane was sandwiched by acrylic plates. DMFC anodes and cathodes were continuously supplied by fuel, (i.e., aqueous methanol in this case), and ambient air. The open-circuit voltage between these electrodes was monitored through a digital multimeter for estimating the extent of Pt inactivation.
